# Supplementary material
Source: PubMed Central journal article supplement (PMC4450416)
Supplement: pnas.201507303SI.pdf [file pnas.201507303SI.pdf]

# Supporting Information

Kastelic et al. 10.1073/pnas.1507303112

## Calculation of Measurable Properties

The free energy of solution  $A$  is in our approach given by the sum of three contributions:

$$A = A^{\text{id}} + A^{\text{hs}} + A^{\text{ass}}, \quad [\text{S1}]$$

where  $A^{\text{id}}$  is the ideal part,  $A^{\text{hs}}$  the hard-sphere contribution (1), and  $A^{\text{ass}}$  the protein–protein associative part (2–4). The ideal and the hard-sphere contributions are given by the next two expressions:

$$\frac{\beta A^{\text{id}}}{N} = \ln(\Lambda^3 \rho) - 1, \quad [\text{S2}]$$

$$\frac{\beta A^{\text{hs}}}{N} = \frac{\eta(4 - 3\eta)}{(1 - \eta)^2}, \quad [\text{S3}]$$

where  $\Lambda$  is the de Broglie thermal wavelength (5) and  $\eta$  is the packing fraction, related to the density,  $\eta = \pi \rho \sigma^3 / 6$ . Note that  $A^{\text{ass}}$  is defined by Eq. 6 of the main text.

Once the free energy is known other thermodynamic quantities can easily be calculated (5). Chemical potential  $\mu$  of the protein molecule and pressure  $P$  needed in calculations of the coexistence lines are obtained via these equations:

$$\mu = \left[ \frac{\partial(A/V)}{\partial \rho} \right]_{T,V}, \quad [\text{S4}]$$

$$P = \rho \mu - \frac{A}{V}. \quad [\text{S5}]$$

Note that the ideal and the hard-sphere free-energy terms were differentiated analytically, whereas the associating term was evaluated numerically.

In the one-component system of two coexisting phases with equilibrium densities  $\rho_a$  and  $\rho_b$ , additional restrictions must be fulfilled. For every temperature  $T$  the equilibrium conditions read

$$\mu(T, \rho_a) = \mu(T, \rho_b), \quad [\text{S6}]$$

$$P(T, \rho_a) = P(T, \rho_b). \quad [\text{S7}]$$

To compute the number concentrations of the coexisting phases  $\rho_a$  and  $\rho_b$  efficiently, the iterative Newton–Raphson method was used. The convergence criterion, requesting for the

sum of relative errors in  $\rho_a$  and  $\rho_b$  to be less than  $10^{-4}$ , was typically reached in fewer than five iterations.

The results for the reduced chemical potential  $\beta\mu$  and dimensionless pressure  $\beta P \sigma^3$  showing the coexisting points for lysozyme at  $T = 270$  K and  $\gamma$ IIIa-crystallin at  $T = 300$  K are shown in Fig. S1. Dashed horizontal lines connect the number densities  $\rho_a$  and  $\rho_b$  of the two coexisting phases. The differences between densities of the coexisting phases,  $\rho_b - \rho_a$ , observed in Fig. S1 increase with the number of binding sites  $M$ . It is clear from our computation that larger number of sites  $M$  (solid line,  $\gamma$ IIIa-crystallin,  $M = 14$ ) yields a broader liquid–liquid phase diagram. For a lower number of sites (dotted and dashed line, lysozyme,  $M = 10$ ) a somewhat deeper potential well would be needed to obtain the same critical temperature, determined by the  $\beta\mu$  and  $\beta P \sigma^3$  curves.

Among thermodynamic properties, the second virial coefficient  $B_2$  is very important. In the framework of Wertheim's theory it is given by the next expression (6):

$$B_2 = B_2^{(\text{hs})} - 2\pi M^2 \int_{\sigma}^{2d+a_w} e_{\text{R}}(r) \bar{f}_{\text{ass}}(r) r^2 dr, \quad [\text{S8}]$$

where  $e_{\text{R}}(r) = \exp[-\beta u_{\text{R}}(r)]$ ,  $\bar{f}_{\text{ass}}(r)$  is the solid-angle average of the Mayer function defined as

$$\bar{f}_{\text{ass}}(r) = \int f_{\text{AB}}(\mathbf{x}_{\text{AB}}(r)) d\Omega_{\text{A}} d\Omega_{\text{B}}, \quad [\text{S9}]$$

$f_{\text{AB}}(\mathbf{x}_{\text{AB}}(r)) = \exp[-\beta u_{\text{AB}}(\mathbf{x}_{\text{AB}}(r))] - 1$  is the site–site Mayer function, and  $\Omega_{\text{A}}$  and  $\Omega_{\text{B}}$  are the solid angles. Wertheim (7) obtained the result in analytical form

$$\bar{f}_{\text{ass}}(r) = \frac{\exp(\beta e_w) - 1}{24d^2 r} (a_w + 2d - r)^2 \times (2a_w - 2d + r) \quad [\text{S10}]$$

Another measurable quantity, closely related to  $B_2$ , is the osmotic compressibility  $\chi_{\text{osm}}$  (8):

$$\chi_{\text{osm}} = \left( \frac{\partial \beta P}{\partial \rho} \right)_{N,T} = 1 + 2B_2 \rho + \dots \quad [\text{S11}]$$

$\chi_{\text{osm}}$  was obtained by numerical differentiation of the pressure as suggested in the first part of Eq. S11.

1. Mansoori GA, Carnahan NF, Starling KE, Leland TW (1971) Equilibrium thermodynamic properties of the mixture of hard spheres. *J Chem Phys* 54(4):1523–1525.
2. Wertheim MS (1986) Fluids with highly directional attractive forces. III. Multiple attraction sites. *J Stat Phys* 42(3-4):459–476.
3. Wertheim MS (1986) Fluids with highly directional attractive forces. IV. Equilibrium polymerization. *J Stat Phys* 42(3-4):477–492.
4. Chapman WG, Jackson G, Gubbins K (1988) Phase equilibria of associating fluids chain molecules with multiple bonding sites. *Mol Phys* 65(5):1057–1079.
5. Hansen JP, McDonald IR (2006) *Theory of Simple Liquids* (Elsevier, Amsterdam).

6. Bianchi E, Tartaglia P, Zaccarelli E, Sciortino F (2008) Theoretical and numerical study of the phase diagram of patchy colloids: Ordered and disordered patch arrangements. *J Chem Phys* 128(14):144504.
7. Wertheim MS (1986) Fluids of dimerizing hard spheres, and fluid mixtures of hard spheres and dispheres. *J Chem Phys* 85(5):2929–2936.
8. Rosenbaum DF, Kulkarni A, Ramakrishnan S, Zukoski CF (1999) Protein interactions and phase behavior: Sensitivity to the form of the pair potential. *J Chem Phys* 111(21):9882–9890.

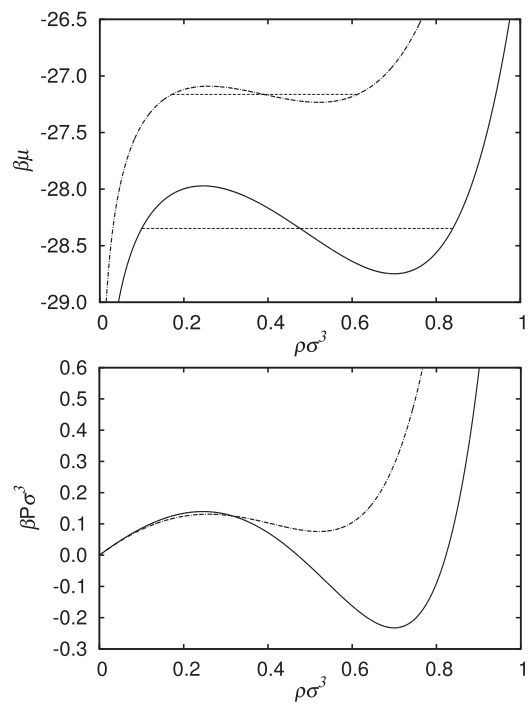

**Fig. S1.** Calculated reduced chemical potential  $\beta\mu$  and dimensionless pressure  $\beta P\sigma^3$  for lysozyme (dotted and dashed line,  $T = 270$  K) and  $\gamma$ IIa-crystallin (solid line,  $T = 300$  K), based on parameters from Table 1 of the main text.
